# Supplementary material for: Activated Mesenchymal Stromal Cells Process and Present Antigens Regulating Adaptive Immunity
Source: PubMed Central journal article supplement (PMC6457321; doi:10.3389/fimmu.2019.00694), 2019-04-03
Supplement: Data_Sheet_1.pdf [file Data_Sheet_1.pdf]

**Supplemental table S1.** List of anti-human monoclonal antibodies used for MSC phenotyping

| Target | Clone   | Fluorochrome | Company         |
|--------|---------|--------------|-----------------|
| CD73   | AD2     | PE-Cy7       | Biolegend       |
| CD90   | Thy-1A1 | APC          | R&D systems     |
| CD105  | 43A3    | PE           | Biolegend       |
| HLA DR | G46-6   | BV605        | BD Biosciences  |
| CD80   | BB1     | FITC         | BD Pharmigen    |
| CD86   | L307.4  | PE           | BD Pharmigen    |
| CXCR3  | 1C6     | PE           | BD Pharmigen    |
| CCR7   | 3D12    | FITC         | eBiosciences    |
| FAS    | DX2     | FITC         | Biolegend       |
| ILT3   | ZM3.8   | PE-Cy7       | Beckman Coulter |
| PDL1   | MIH1    | PDL-1        | eBiosciences    |
| IDO    | Eyedio  | PE           | eBiosciences    |
| CD3    | UCHT1   | AF700        | BD Biosciences  |
| CD4    | RPA-T4  | APC-Cy7      | BD Biosciences  |
| CD14   | 61D3    | FITC         | Thermo Fisher   |
| CD19   | HIB19   | PerCP-Cy5.5  | Biolegend       |
| CD34   | 561     | AF700        | Biolegend       |
| CD45   | H130    | BV421        | BD Biosciences  |

**Supplemental figure S1.** (A) Gating strategy MSCs. (B) Gating strategy lymphocytes.

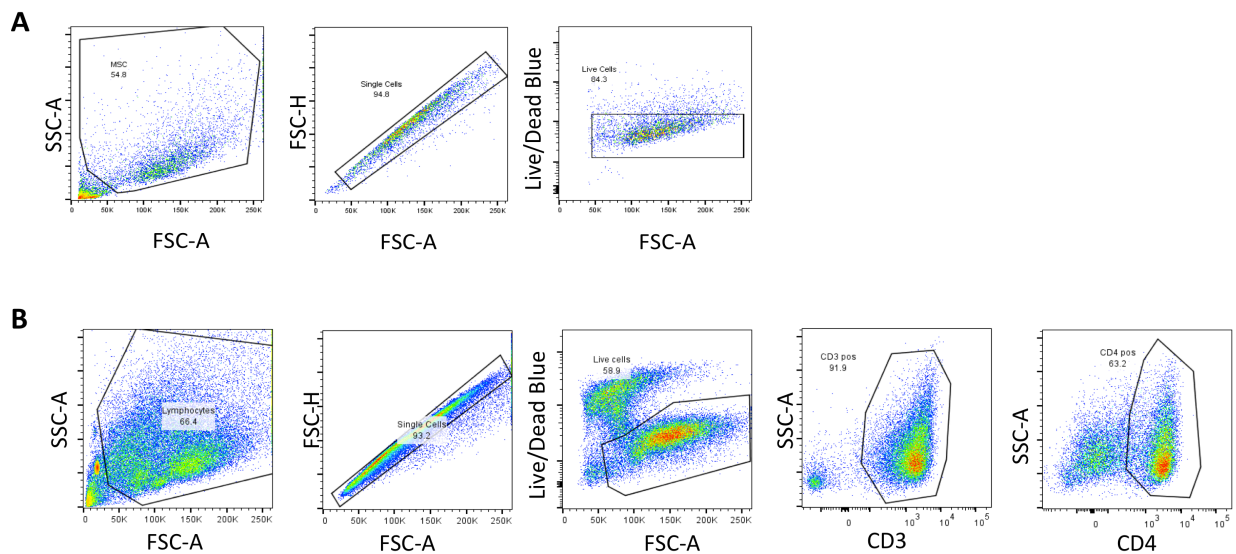

**Supplemental figure S2.** Negative markers of MSCs.

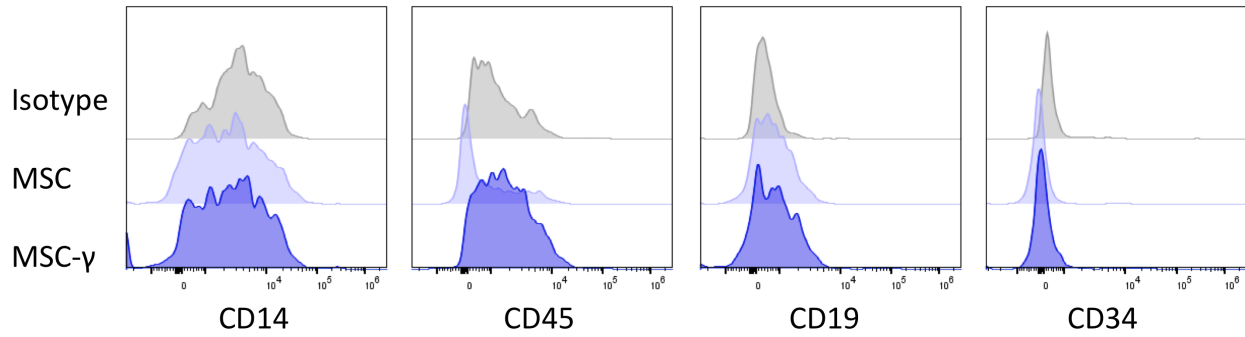

Representative histograms of negative markers for non-activated (MSC) and activated MSCs (MSC- $\gamma$ ), compared to isotype controls. N= 5.

**Supplemental figure S3.** Cytokine production of activated and non-activated GAD-specific T-cell clone.

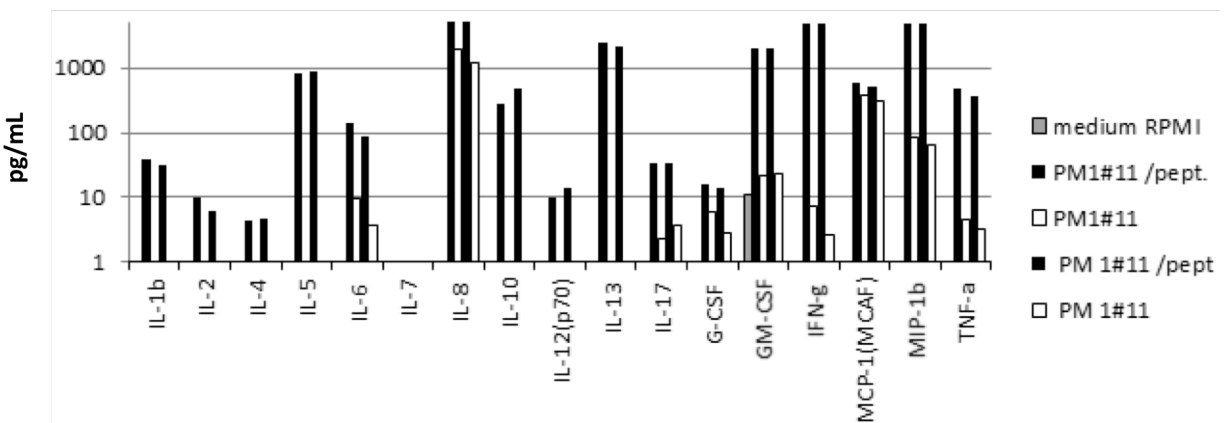

Cytokine profile of GAD65 T-cell clone upon GAD65 peptide stimulation. Results are shown as result of two independent experiments. Grey bars show the cytokine concentration in media (RPMI), white bars the cytokine profile of resting GAD65 T-cells and the black bars indicate the peptide specific cytokines release.

**Supplemental figure S4.** Cytokine production of activated and non-activated MSCs.

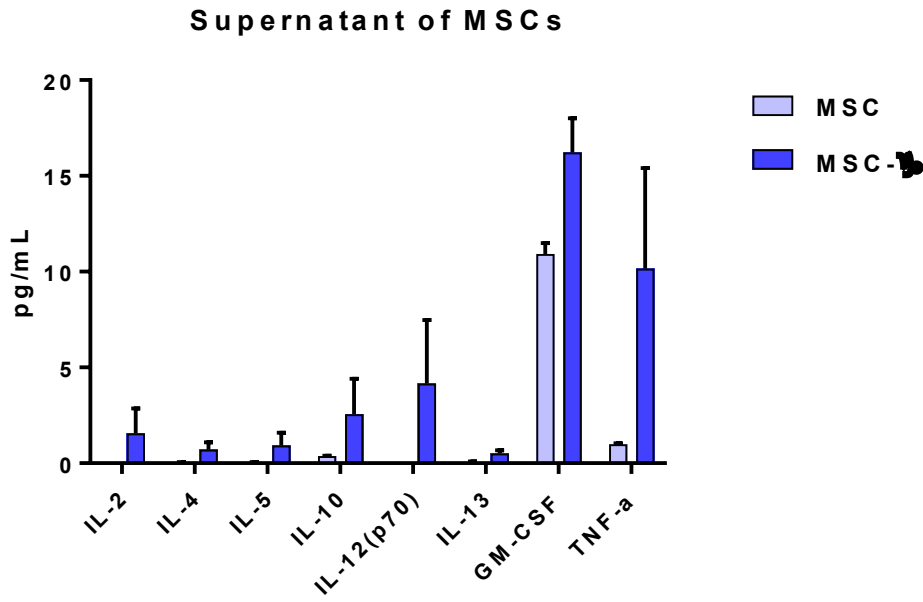

Luminex assay of the supernatant of non-activated (MSC) and activated MSCs (MSC- $\gamma$ ). The data are presented as mean  $\pm$  SD of three different MSC donors.
